# Supplementary material for: Quintuple super bonding between the superatoms of metallic clusters
Source: Royal Society of Chemistry journal article supplement (doi:10.1039/c7nr03114a), 2017-01-01
Supplement: c7nr03114a1.pdf [file c7nr03114a1.pdf]

## Supporting Information

### **Quintuple super bonding between superatoms of metallic clusters**

by

Haiyan Wang<sup>a</sup>, and Longjiu Cheng<sup>a,b\*</sup>

<sup>a</sup>Department of Chemistry, Anhui University, Hefei, Anhui, 230601, PR China.

Email: [clj@ustc.edu](mailto:clj@ustc.edu).

<sup>b</sup>AnHui Province Key Laboratory of Chemistry for Inorganic/Organic Hybrid Functionalized Materials, Hefei, Anhui 230601, P. R. China..

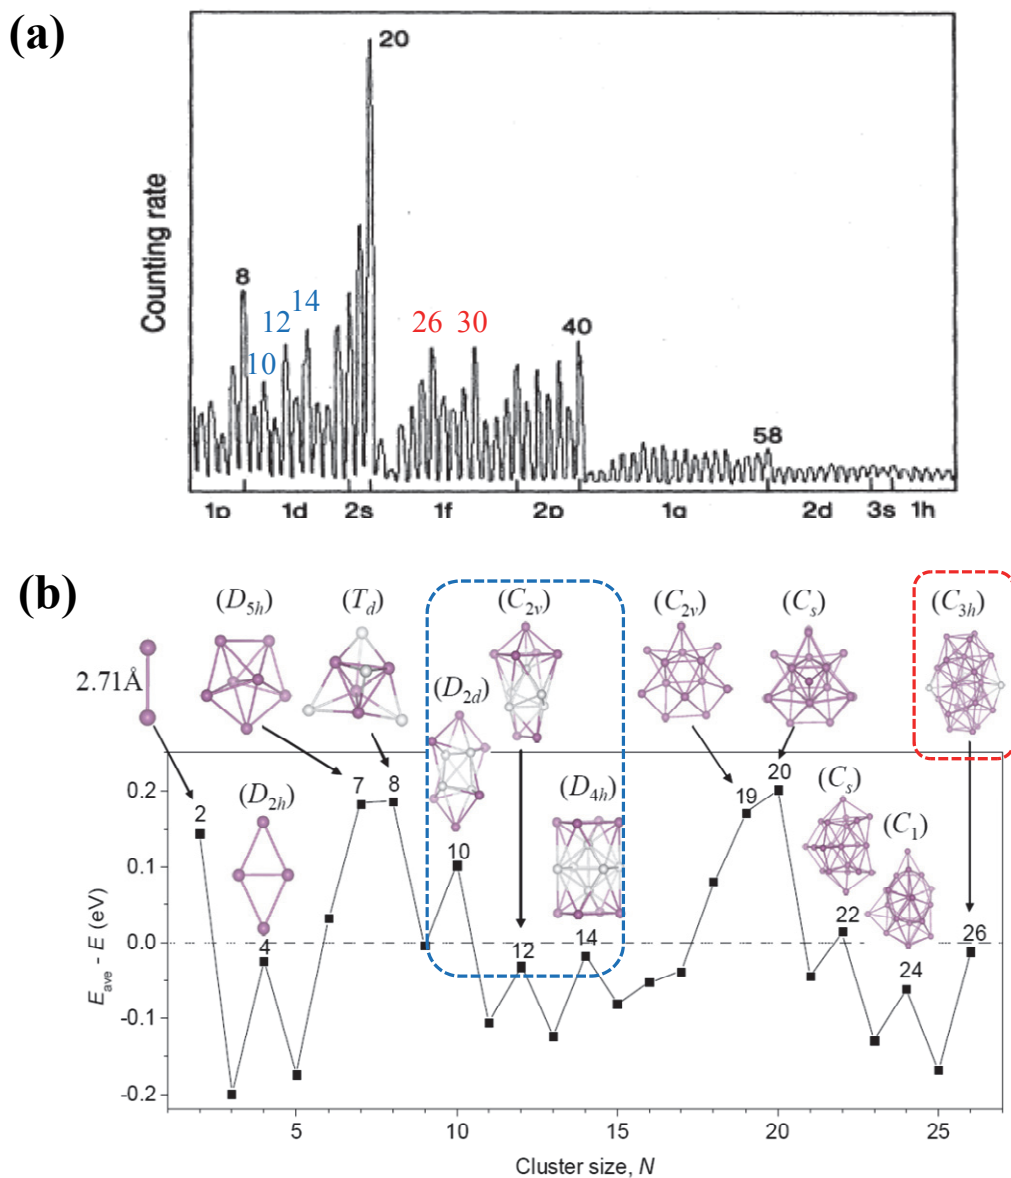

**Figure S1.** (a) Mass spectra of sodium clusters (Phys. Rev. Lett. 1984, 52, 2141). (b) Relative stability of lithium clusters calculated at B3LYP/6-311+G\* level of theory (J. Chem. Phys. 2013, 138, 141101), where positive peaks represent higher stability.

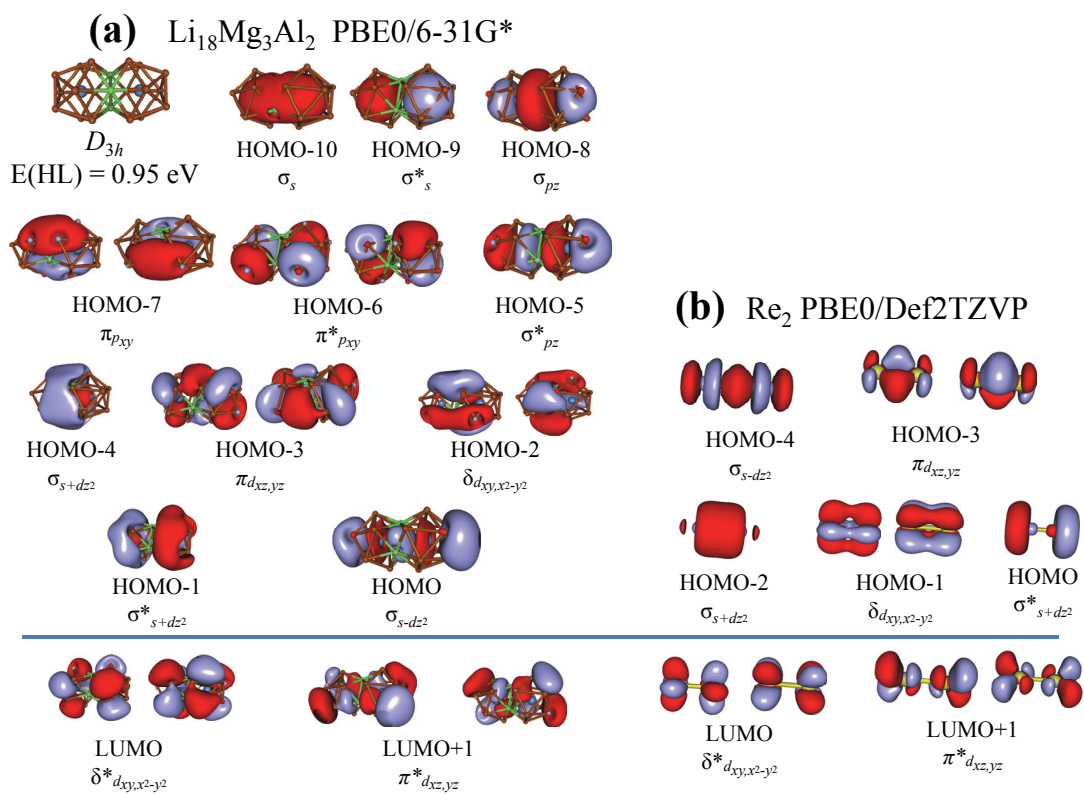

**Figure S2.** Canonical molecular orbital diagrams of a)  $\text{Li}_{18}\text{Mg}_3\text{Al}_2$  cluster (PBE0/6-31G\*) and (b)  $\text{Re}_2$  molecule (PBE0/def2-TZVP)..

XYZ coordinates (Å) of the structures discussed in this paper.

Li<sub>26</sub> clusters

**A1**

|    |           |           |           |
|----|-----------|-----------|-----------|
| Li | -1.350380 | 1.531166  | -4.563591 |
| Li | 0.426943  | 3.033581  | -2.438428 |
| Li | 1.717956  | 1.006505  | -4.585830 |
| Li | -2.235808 | 1.937201  | -1.384455 |
| Li | -0.270603 | -1.379113 | -4.797819 |
| Li | -2.256925 | 1.684789  | 1.654105  |
| Li | 0.017848  | 0.213430  | -2.569240 |
| Li | -0.835925 | 4.223498  | 0.345023  |
| Li | 0.182834  | 1.639741  | 0.137480  |
| Li | 2.706387  | 1.158595  | -1.414798 |
| Li | -2.666014 | -1.274043 | 2.569047  |
| Li | 2.257634  | -1.537343 | -2.805391 |
| Li | -1.516403 | -0.661195 | -0.065465 |
| Li | -0.438854 | -2.717251 | -1.758583 |
| Li | -1.415013 | 0.758779  | 4.734589  |
| Li | 0.389757  | 2.589204  | 2.911184  |
| Li | 1.333501  | -0.978423 | -0.072008 |
| Li | -0.017857 | -0.213407 | 2.569239  |
| Li | -2.628837 | -0.829655 | -2.780600 |
| Li | 2.685266  | 0.906187  | 1.623798  |
| Li | -0.335213 | -2.151493 | 4.500323  |
| Li | -3.251743 | -2.831089 | -0.257775 |
| Li | 4.087620  | -1.392433 | -0.087259 |
| Li | -0.459969 | -2.969651 | 1.279939  |
| Li | 2.220452  | -1.981724 | 2.544202  |
| Li | 1.653345  | 0.234143  | 4.712314  |

**A2**

|    |           |           |           |
|----|-----------|-----------|-----------|
| Li | 1.698022  | -0.916287 | 4.747866  |
| Li | 2.486036  | 1.395254  | 2.720314  |
| Li | 2.821483  | -1.503590 | 1.564459  |
| Li | -0.061394 | 1.665866  | 4.604388  |
| Li | 0.474079  | -3.136689 | 2.789005  |
| Li | 0.186530  | -0.305938 | 2.578133  |
| Li | -1.373501 | -1.192198 | 4.677577  |
| Li | 2.670800  | 3.234497  | 0.000000  |
| Li | 2.821483  | -1.503590 | -1.564459 |
| Li | 1.573848  | 0.601863  | 0.000000  |
| Li | 0.410985  | -1.990202 | 0.000000  |
| Li | 0.010260  | 2.533969  | 1.511225  |
| Li | -2.407346 | 0.963545  | 2.625023  |
| Li | 0.474079  | -3.136689 | -2.789005 |
| Li | 2.486036  | 1.395254  | -2.720314 |
| Li | -2.704148 | 2.851244  | 0.000000  |
| Li | 1.698022  | -0.916287 | -4.747866 |
| Li | -2.105418 | -1.989412 | 1.549750  |
| Li | -4.071058 | -0.071427 | 0.000000  |
| Li | 0.186530  | -0.305938 | -2.578133 |
| Li | -1.337928 | 0.344983  | 0.000000  |
| Li | -2.105418 | -1.989412 | -1.549750 |
| Li | 0.010260  | 2.533969  | -1.511225 |
| Li | -1.373501 | -1.192198 | -4.677577 |
| Li | -0.061394 | 1.665866  | -4.604388 |
| Li | -2.407346 | 0.963545  | -2.625023 |

**A3**

|    |           |           |           |
|----|-----------|-----------|-----------|
| Li | 0.484132  | 1.775011  | 4.705497  |
| Li | -1.921640 | 2.089492  | 2.727534  |
| Li | -1.667827 | -0.476340 | 4.639372  |
| Li | 0.775486  | 2.909200  | 1.553396  |
| Li | 1.319232  | -1.231286 | 4.651518  |
| Li | 0.775486  | 2.909200  | -1.553396 |
| Li | 0.075078  | 0.066734  | 2.577955  |
| Li | -3.599618 | 2.154585  | 0.000000  |
| Li | -1.031006 | 1.264879  | 0.000000  |
| Li | -2.684428 | -0.663540 | 1.492757  |

|    |           |           |           |
|----|-----------|-----------|-----------|
| Li | 2.796158  | 0.843377  | -2.705109 |
| Li | -0.649251 | -2.714641 | 2.663332  |
| Li | 1.644054  | 0.496888  | 0.000000  |
| Li | 2.153353  | -1.941151 | 1.525516  |
| Li | 0.484132  | 1.775011  | -4.705497 |
| Li | -1.921640 | 2.089492  | -2.727534 |
| Li | -0.351925 | -1.566185 | 0.000000  |
| Li | 0.075078  | 0.066734  | -2.577955 |
| Li | 2.796158  | 0.843377  | 2.705109  |
| Li | -2.684428 | -0.663540 | -1.492757 |
| Li | 1.319232  | -1.231286 | -4.651518 |
| Li | 4.322162  | -0.133767 | 0.000000  |
| Li | -2.344253 | -3.530114 | 0.000000  |
| Li | 2.153353  | -1.941151 | -1.525516 |
| Li | -0.649251 | -2.714641 | -2.663332 |
| Li | -1.667827 | -0.476340 | -4.639372 |

#### A4

|    |           |           |           |
|----|-----------|-----------|-----------|
| Li | -1.126333 | 1.126333  | 1.126333  |
| Li | 1.126333  | -1.126333 | 1.126333  |
| Li | 1.126333  | 1.126333  | -1.126333 |
| Li | 1.779410  | 1.779410  | 1.779410  |
| Li | 0.000000  | 0.000000  | 3.569644  |
| Li | -1.779410 | -1.779410 | 1.779410  |
| Li | -1.126333 | -1.126333 | -1.126333 |
| Li | -1.779410 | 1.779410  | -1.779410 |
| Li | 0.000000  | 3.569644  | 0.000000  |
| Li | -3.569644 | 0.000000  | 0.000000  |
| Li | -3.078257 | 0.840340  | 3.078257  |
| Li | -0.840340 | 3.078257  | 3.078257  |
| Li | -3.078257 | 3.078257  | 0.840340  |
| Li | 1.779410  | -1.779410 | -1.779410 |
| Li | 0.000000  | -3.569644 | 0.000000  |
| Li | 3.569644  | 0.000000  | 0.000000  |
| Li | 3.078257  | -0.840340 | 3.078257  |
| Li | 0.840340  | -3.078257 | 3.078257  |
| Li | 3.078257  | -3.078257 | 0.840340  |
| Li | 0.000000  | 0.000000  | -3.569644 |
| Li | 3.078257  | 0.840340  | -3.078257 |
| Li | 0.840340  | 3.078257  | -3.078257 |
| Li | 3.078257  | 3.078257  | -0.840340 |
| Li | -3.078257 | -3.078257 | -0.840340 |
| Li | -3.078257 | -0.840340 | -3.078257 |
| Li | -0.840340 | -3.078257 | -3.078257 |

#### A5

|    |           |           |           |
|----|-----------|-----------|-----------|
| Li | -2.742638 | 1.583483  | 1.877091  |
| Li | -0.000016 | 1.952005  | 0.871339  |
| Li | -2.684013 | -1.549674 | 3.448533  |
| Li | -1.690662 | -0.976152 | 0.871508  |
| Li | -1.545921 | 0.892539  | 4.956193  |
| Li | -0.000079 | 3.099255  | 3.448339  |
| Li | 1.690326  | -0.975893 | 0.871357  |
| Li | -0.000072 | -0.000145 | 2.873021  |
| Li | 2.742467  | 1.583569  | 1.877076  |
| Li | 0.000048  | -1.785167 | 4.956350  |
| Li | -0.000207 | -3.166778 | 1.877185  |
| Li | 2.683984  | -1.549724 | 3.448313  |
| Li | 1.546000  | 0.892491  | 4.956130  |
| Li | -1.546000 | -0.892491 | -4.956130 |
| Li | -2.683984 | 1.549724  | -3.448313 |
| Li | -0.000048 | 1.785167  | -4.956350 |
| Li | -2.742467 | -1.583569 | -1.877076 |
| Li | 1.545921  | -0.892539 | -4.956193 |
| Li | 0.000072  | 0.000145  | -2.873021 |
| Li | -1.690326 | 0.975893  | -0.871357 |
| Li | 0.000207  | 3.166778  | -1.877185 |
| Li | 2.684013  | 1.549674  | -3.448533 |
| Li | 0.000016  | -1.952005 | -0.871339 |

|    |          |           |           |
|----|----------|-----------|-----------|
| Li | 2.742638 | -1.583483 | -1.877091 |
| Li | 1.690662 | 0.976152  | -0.871508 |
| Li | 0.000079 | -3.099255 | -3.448339 |

Li<sub>20</sub>Mg<sub>3</sub> clusters

**B1**

|    |           |           |           |
|----|-----------|-----------|-----------|
| Li | -4.617647 | -0.004062 | 1.808923  |
| Li | -4.617613 | -1.564559 | -0.908027 |
| Li | -4.617613 | 1.568622  | -0.900991 |
| Li | -2.740628 | 0.006585  | -2.932755 |
| Li | -2.496355 | 0.000000  | -0.000025 |
| Li | 1.554381  | -2.508719 | -1.455887 |
| Li | 4.617614  | -1.564559 | -0.908027 |
| Li | 2.496356  | -0.000000 | -0.000025 |
| Li | 4.617614  | 1.568621  | -0.900991 |
| Li | 4.617647  | -0.004062 | 1.808923  |
| Li | 2.740665  | -2.543134 | 1.460670  |
| Li | -1.554380 | -2.508720 | -1.455887 |
| Li | -2.740665 | -2.543134 | 1.460670  |
| Li | -1.554424 | -0.006513 | 2.900583  |
| Li | 1.554425  | -0.006513 | 2.900582  |
| Li | -1.554380 | 2.515233  | -1.444606 |
| Li | -2.740664 | 2.536549  | 1.472077  |
| Li | 2.740665  | 2.536549  | 1.472076  |
| Li | 1.554381  | 2.515233  | -1.444605 |
| Li | 2.740628  | 0.006586  | -2.932755 |
| Mg | -0.000000 | 0.004024  | -1.791871 |
| Mg | -0.000000 | -1.553841 | 0.892461  |
| Mg | -0.000000 | 1.549817  | 0.899430  |

**B2**

|    |           |           |           |
|----|-----------|-----------|-----------|
| Li | 1.627265  | 4.358830  | 0.000000  |
| Li | 0.010000  | 3.197936  | 2.505477  |
| Li | -1.599906 | 4.368981  | 0.000001  |
| Li | -2.774567 | -1.590286 | 2.505471  |
| Li | 0.009998  | 3.197937  | -2.505477 |
| Li | -4.588528 | -0.770070 | -0.000001 |
| Li | -2.510882 | 1.460171  | 1.483188  |
| Li | -0.000028 | 0.000065  | 2.307833  |
| Li | -2.510883 | 1.460170  | -1.483188 |
| Li | 2.519963  | 1.444482  | 1.483198  |
| Li | -2.774566 | -1.590288 | -2.505471 |
| Li | -0.000028 | 0.000065  | -2.307833 |
| Li | 2.764555  | -1.607659 | 2.505492  |
| Li | -0.009151 | -2.904504 | 1.483221  |
| Li | 2.519962  | 1.444483  | -1.483198 |
| Li | -2.983826 | -3.570029 | 0.000001  |
| Li | 2.961279  | -3.588686 | -0.000000 |
| Li | 4.583637  | -0.798912 | 0.000000  |
| Li | -0.009150 | -2.904504 | -1.483221 |
| Li | 2.764555  | -1.607658 | -2.505492 |
| Mg | 0.005914  | 1.878562  | -0.000000 |
| Mg | -1.629906 | -0.934234 | -0.000000 |
| Mg | 1.624068  | -0.944459 | -0.000000 |

**B3**

|    |           |           |           |
|----|-----------|-----------|-----------|
| Li | -1.483125 | -4.517645 | 0.000000  |
| Li | 1.333498  | -4.303224 | 1.569869  |
| Li | 1.333498  | -4.303224 | -1.569869 |
| Li | 3.284063  | -1.830710 | 0.000000  |
| Li | 1.594975  | 1.691314  | 2.482438  |
| Li | 1.372935  | 4.711677  | 1.538143  |
| Li | 0.177410  | 2.720739  | 0.000000  |
| Li | 1.372935  | 4.711677  | -1.538143 |
| Li | -1.436722 | 4.935204  | 0.000000  |
| Li | -1.219793 | 3.075340  | 2.487754  |
| Li | 1.574421  | -1.241551 | 2.517728  |
| Li | -1.292262 | -2.575185 | 2.561167  |

|                 |           |           |           |
|-----------------|-----------|-----------|-----------|
| Li              | -2.802279 | -1.397910 | 0.000000  |
| Li              | -2.750421 | 1.884285  | 0.000000  |
| Li              | 1.574421  | -1.241551 | -2.517728 |
| Li              | -1.292262 | -2.575185 | -2.561167 |
| Li              | -1.219793 | 3.075340  | -2.487754 |
| Li              | 1.594975  | 1.691314  | -2.482438 |
| Li              | 3.287127  | 2.352915  | 0.000000  |
| Li              | 1.573213  | 0.253562  | 0.000000  |
| Mg <sub>g</sub> | -0.899986 | 0.229623  | 1.613232  |
| Mg <sub>g</sub> | -0.899986 | 0.229623  | -1.613232 |
| Mg              | 0.155768  | -2.238541 | 0.000000  |

**B4**

|                 |           |           |           |
|-----------------|-----------|-----------|-----------|
| Li              | 1.660680  | 4.615211  | 0.592780  |
| Li              | -1.660680 | 4.615211  | 0.592780  |
| Li              | -0.000000 | 4.525658  | -2.129363 |
| Li              | -2.643098 | 2.364616  | -1.688660 |
| Li              | -2.535315 | -1.523274 | 1.301176  |
| Li              | -1.660680 | -4.615211 | 0.592780  |
| Li              | -0.000000 | -4.525658 | -2.129363 |
| Li              | 1.660680  | -4.615211 | 0.592780  |
| Li              | 0.000000  | -2.853245 | 2.726497  |
| Li              | -2.535315 | 1.523274  | 1.301176  |
| Li              | 0.000000  | 2.853245  | 2.726497  |
| Li              | 2.535315  | 1.523274  | 1.301176  |
| Li              | 2.535315  | -1.523274 | 1.301176  |
| Li              | -0.000000 | 1.429719  | -3.055911 |
| Li              | 2.643098  | 2.364616  | -1.688660 |
| Li              | 2.643098  | -2.364616 | -1.688660 |
| Li              | -0.000000 | -1.429719 | -3.055911 |
| Li              | -2.643098 | -2.364616 | -1.688660 |
| Li              | -1.428730 | 0.000000  | -0.911181 |
| Li              | 1.428730  | -0.000000 | -0.911181 |
| Mg <sub>g</sub> | 0.000000  | 2.442105  | -0.177614 |
| Mg <sub>g</sub> | 0.000000  | -0.000000 | 1.834911  |
| Mg              | -0.000000 | -2.442105 | -0.177614 |

Li18Mg3Al2 clusters

**C1**

|                 |           |           |           |
|-----------------|-----------|-----------|-----------|
| Mg              | 0.000000  | 1.785947  | 0.000000  |
| Mg <sub>g</sub> | -1.546675 | -0.892973 | 0.000000  |
| Mg <sub>g</sub> | 1.546675  | -0.892973 | 0.000000  |
| Al              | 0.000000  | 0.000000  | 2.620490  |
| Al              | 0.000000  | 0.000000  | -2.620490 |
| Li              | 0.000000  | -1.714784 | 4.753163  |
| Li              | -1.485047 | 0.857392  | 4.753163  |
| Li              | 1.485047  | 0.857392  | 4.753163  |
| Li              | 0.000000  | 2.848454  | 2.809608  |
| Li              | -2.466833 | -1.424227 | 2.809608  |
| Li              | 2.466833  | -1.424227 | 2.809608  |
| Li              | -2.439155 | 1.408247  | 1.592569  |
| Li              | 2.439155  | 1.408247  | 1.592569  |
| Li              | 0.000000  | -2.816494 | 1.592569  |
| Li              | -2.439155 | 1.408247  | -1.592569 |
| Li              | 2.439155  | 1.408247  | -1.592569 |
| Li              | 0.000000  | -2.816494 | -1.592569 |
| Li              | -2.466833 | -1.424227 | -2.809608 |
| Li              | 2.466833  | -1.424227 | -2.809608 |
| Li              | 0.000000  | 2.848454  | -2.809608 |
| Li              | 0.000000  | -1.714784 | -4.753163 |
| Li              | 1.485047  | 0.857392  | -4.753163 |
| Li              | -1.485047 | 0.857392  | -4.753163 |
